# Supplementary material
Source: publisher site journal article supplement (https://www.dovepress.com/article/537983)

Supplementary Materials for

**Dissolvable microneedle administration combined with ultrasonic cavitation promotes Melanoma penetrating capability of Ce6**

Binrui Shi1,2,3,4,7 #

Mingjie Li1,2,3,4 #

Renjie Feng1,2,3,4

Guihua Wang5

Liyong Deng5

Yueyong Li5

Kezhen Wang1,2,3,6

Meng Du1,2,3,7 *

Zhiyi Chen1,2,3,7 *

#These authors contributed equally to this work

1 Key Laboratory of Medical Imaging Precision Theranostics and Radiation Protection, College of Hunan Province, the Affiliated Changsha Central Hospital, Hengyang Medical School, University of South China, Changsha 410004, Hunan, China.

2 Institute of Medical Imaging, Hengyang Medical School, University of South China, Hengyang 421001, Hunan, China

3 Department of Medical imaging, The Affiliated Changsha Central Hospital, Hengyang Medical School, University of South China, Changsha 410004, Hunan, China

4 The Seventh Affiliated Hospital, Hunan Veterans Administration Hospital, Hengyang Medical School, University of South China, Changsha 410118, Hunan, China

5 Department of Oncology, the Affiliated Changsha Central Hospital, Hengyang Medical School, University of South China, Changsha 410004, Hunan, China.

6 College of Mechanical Engineering, University of South China, Changsha 410004, Hunan, China.

7 Institute for Future Sciences, University of South China, Changsha, Hunan, 410008, China

Corresponding Author: Meng Du, Zhiyi Chen,

Key Laboratory of Medical Imaging Precision Theranostics and Radiation Protection, College of Hunan Province, the Affiliated Changsha Central Hospital, Hengyang Medical School, University of South China, Changsha 410004, Hunan, China.

*Correspondence: Meng Du [dumeng_work@126.com](mailto:dumeng_work@126.com), Zhiyi Chen zhiyi_chen@usc.edu.cn

**Supplementary Figures**

**Figure S1.** Observation of DPP by B16F10 cells under fluorescence microscopy (Scale bar: 50 μm，blue: tumor nuclei stained with DAPI; Green: DPP


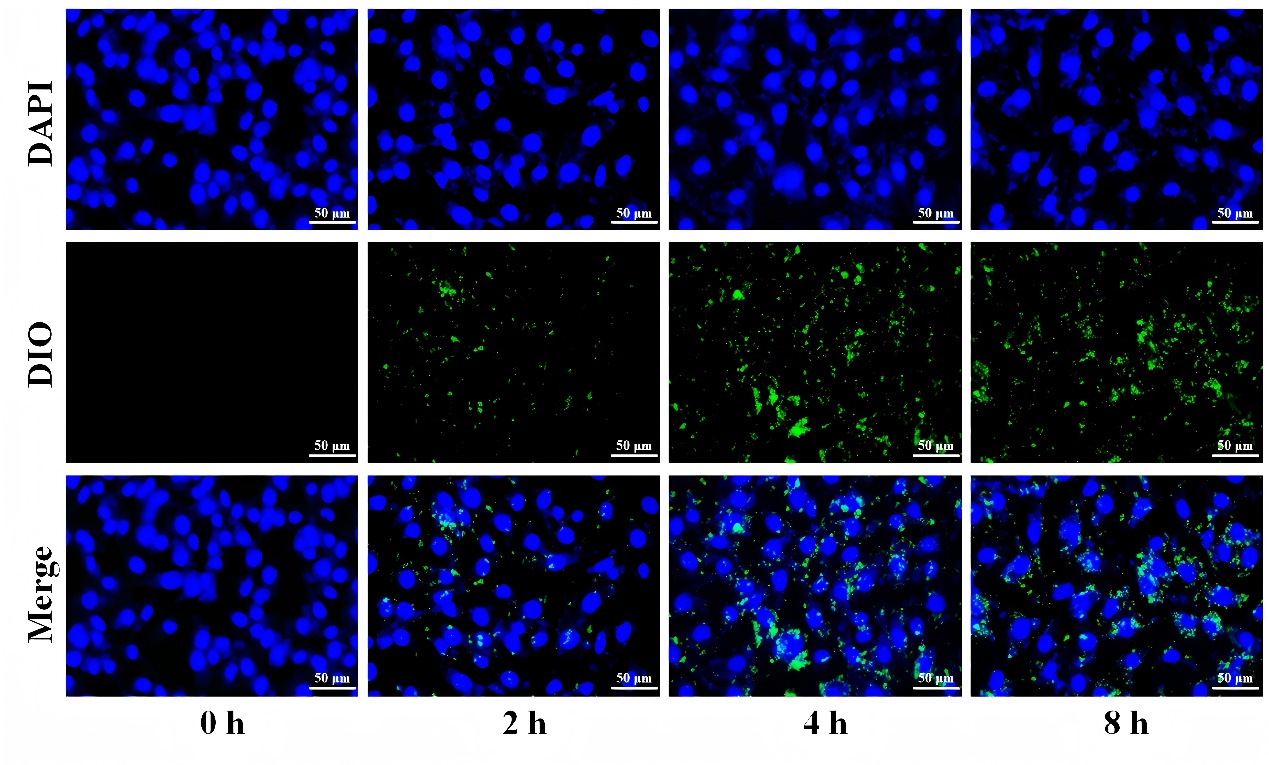


**Figure S2.** The relative viability of cells after co-incubation with different concentrations of CPP and B16F10 cells (with or without US irradiation)


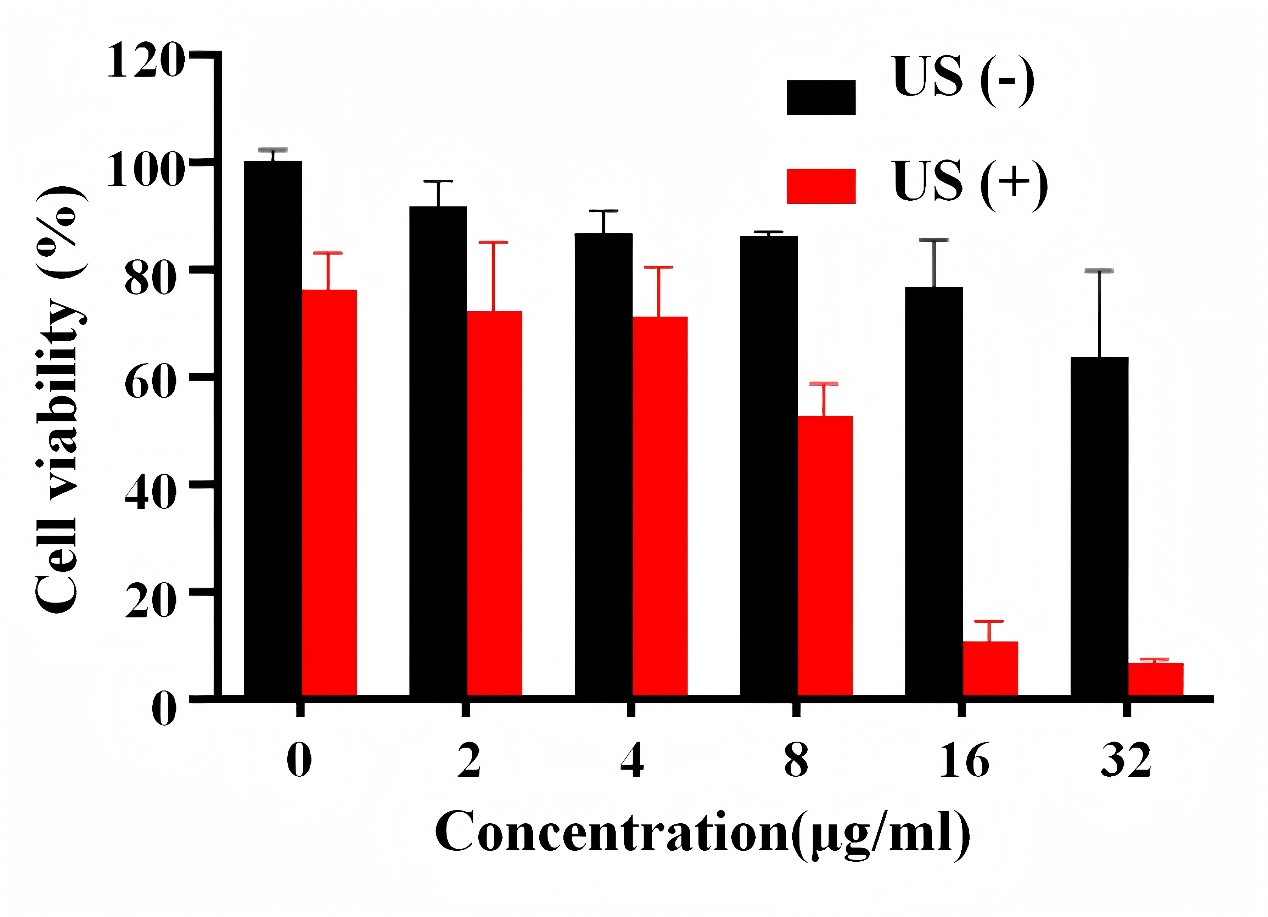

Supplement: Supplementary file 1 [file 537983%20Supplementary%20materials.docx]
